# Supplementary material for: Reprotoxicity of gold, silver, and gold–silver alloy nanoparticles on mammalian gametes
Source: Royal Society of Chemistry journal article supplement (doi:10.1039/c3an01463k), 2013-10-08
Supplement: c3an01463k.pdf [file c3an01463k.pdf]

## Electronic Supplementary Information

### Reprotoxicity of gold, silver, and gold-silver alloy nanoparticles on mammalian gametes

Daniela Tiedemann<sup>1#</sup>, Ulrike Taylor<sup>1#</sup>, Christoph Rehbock<sup>2</sup>, Jurij Jakobi<sup>2</sup>, Sabine Klein<sup>1</sup>,  
Wilfried A. Kues<sup>1</sup>, Stephan Barcikowski<sup>2\*</sup>, Detlef Rath<sup>1\*</sup>

<sup>1</sup>Institute of Farm Animal Genetics, Friedrich-Loeffler-Institut, Federal Research Institute of Animal Health, Mariensee, Germany

<sup>2</sup>Technical Chemistry I and Center for Nanointegration Duisburg-Essen (CENIDE), University of Duisburg-Essen, Essen, Germany

# Both authors contributed equally \* Corresponding authors

Concerning biological matters:

Prof. Dr. Detlef Rath  
Institute of Farm Animal Genetics (FLI)  
Höltysstraße 10  
31535 Neustadt  
Germany  
Phone: +49 5034 871 144  
Fax: +49 5034 871 101  
rath@tzv.fal.de

Concerning nanoparticles and laser technology:

Prof. Dr. Stephan Barcikowski  
Technical Chemistry I and Center for  
Nanointegration Duisburg-Essen (CENIDE)  
University of Duisburg-Essen  
Universitätsstraße 7  
45141 Essen  
Germany  
Phone: +49 201 183 3150  
Fax: +49 201 183 3049  
stephan.barcikowski@uni-due.de

## S1: Extinction

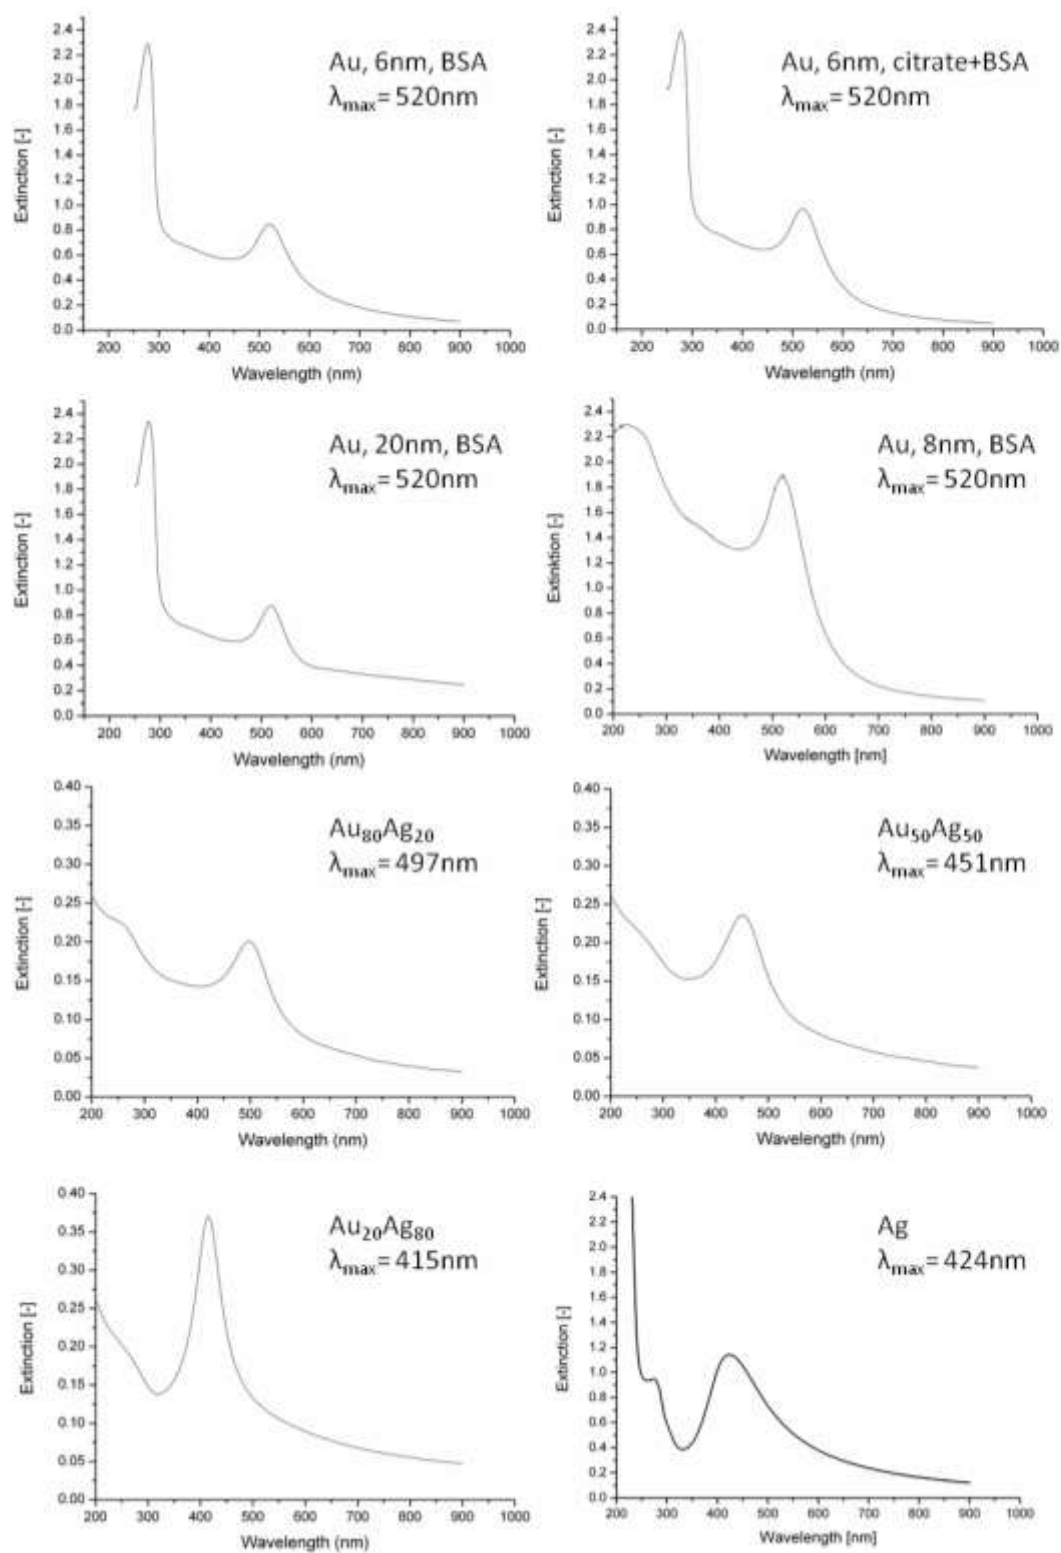

**Figure S1:** Nanoparticle extinction curves obtained by UV-Vis spectroscopy.

## S2: Particle size distribution

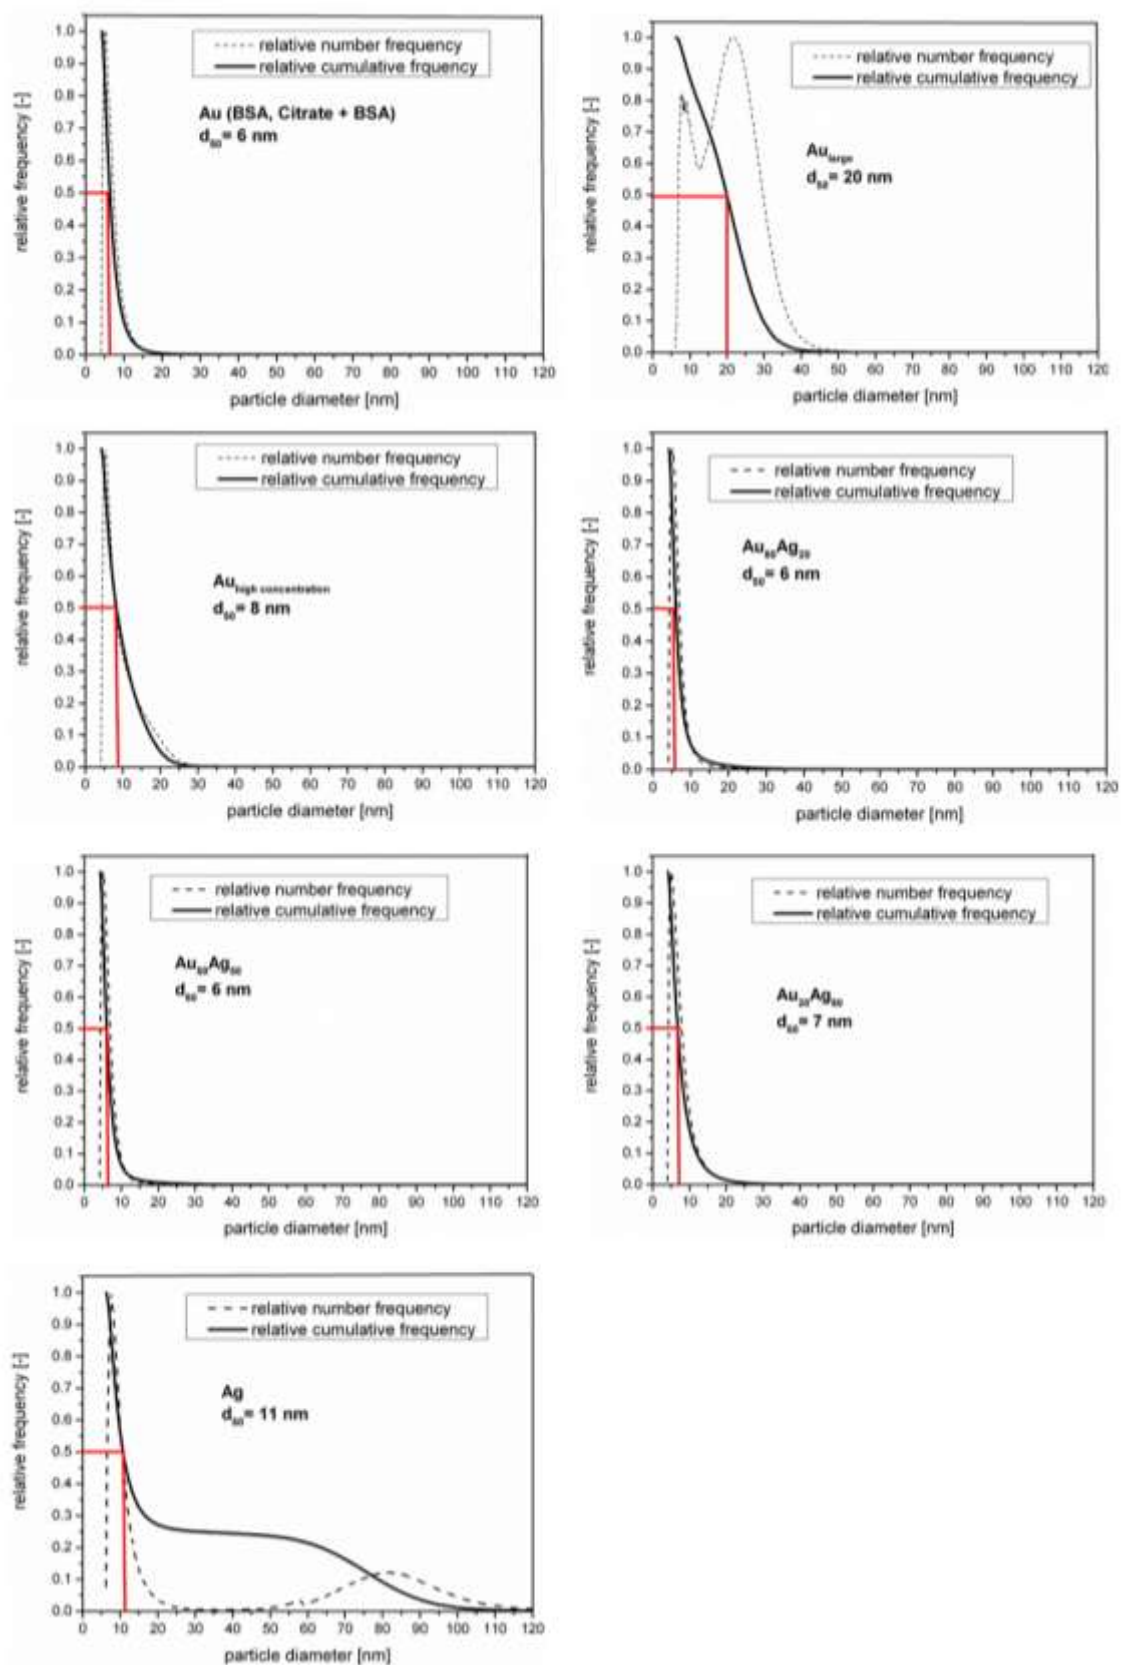

Figure S2: Nanoparticle size distribution obtained by disc centrifugation.
